# Supplementary material for: First transparent oxide ion conducting ceramics synthesized by full crystallization from glass
Source: Royal Society of Chemistry journal article supplement (doi:10.1039/c7ta07621e), 2017-12-11
Supplement: c7ta07621e1.pdf [file c7ta07621e1.pdf]

## ELECTRONIC SUPPLEMENTARY INFORMATION

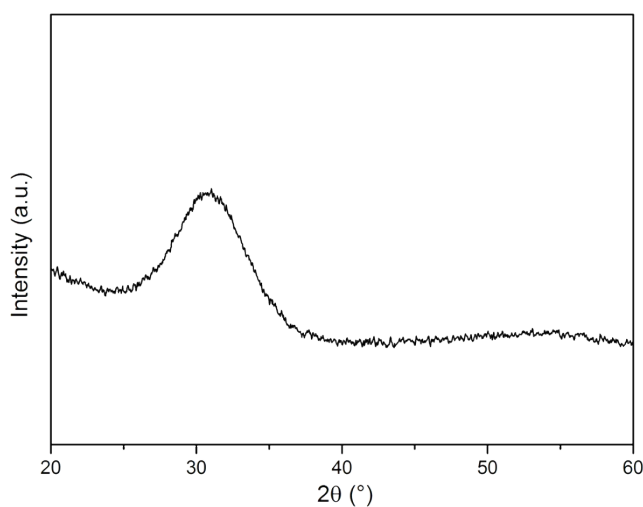

**Fig. S1:** X-Ray diffractogram of the  $\text{Gd}_{1.6}\text{Sr}_{0.4}\text{Ga}_3\text{O}_{7.3}$  glass elaborated by aerodynamic levitation coupled to  $\text{CO}_2$  laser heating.

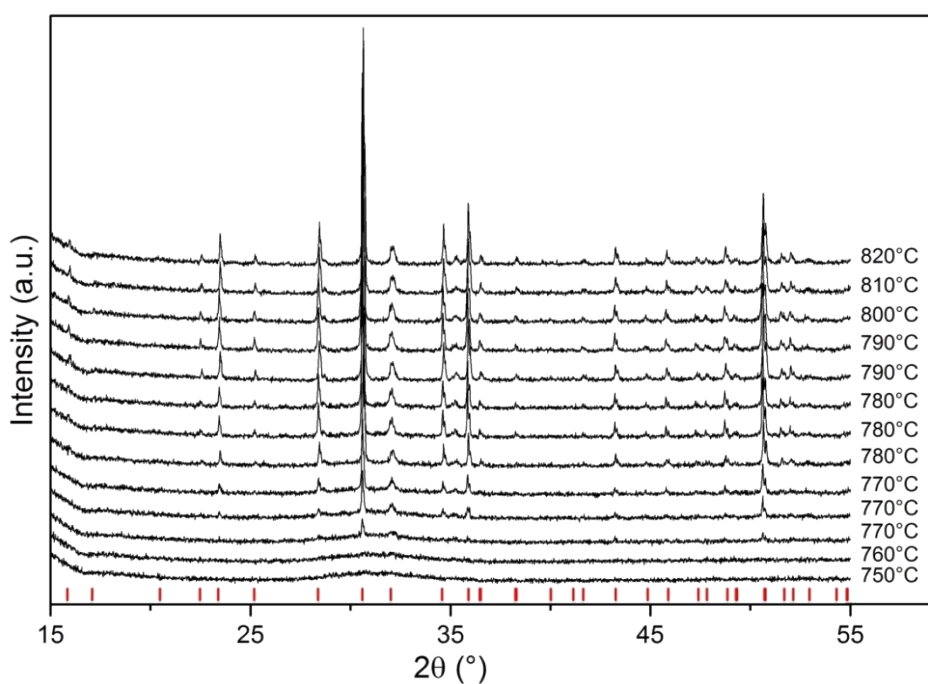

**Fig. S2:** *In situ* X-ray diffraction data of the  $\text{Gd}_{1.6}\text{Sr}_{0.4}\text{Ga}_3\text{O}_{7.8}$  parent glass heated from 750°C up to 820 °C (some measurements have been repeated at a same temperature to track possible isothermal evolution). Only the melilite phase crystallizes from the glass at around 770°C, in good agreement with the DSC measurements. The red marks correspond to the indexation of the  $\text{Gd}_{1.6}\text{Sr}_{0.4}\text{Ga}_3\text{O}_{7.8}$  melilite.

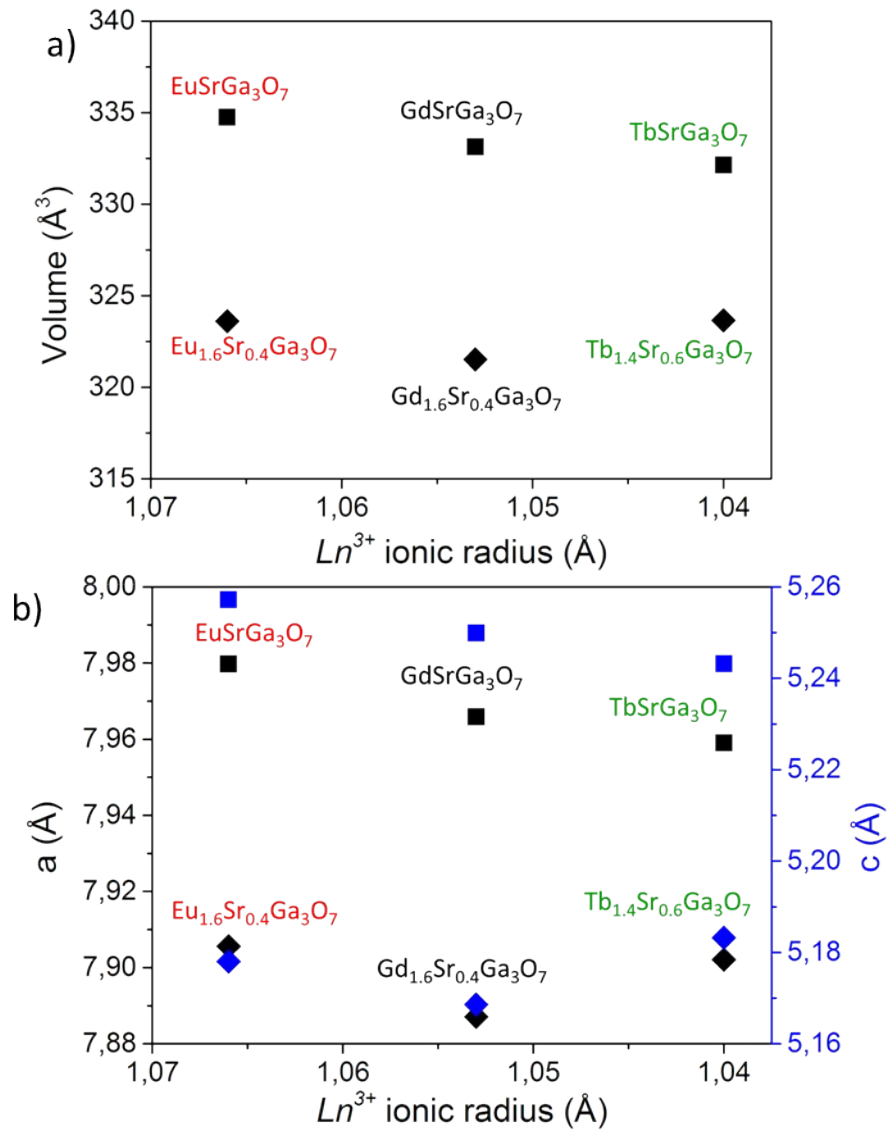

**Fig. S3:** a) Volume and b) cell parameters ( $a$  (black) and  $c$  (blue)) according to the lanthanide radius, of the stoichiometric (square) and non-stoichiometric (diamond) melilite ceramics. The  $Tb_{1.4}Sr_{0.6}Ga_3O_{7+\delta}$  cell parameters decrease to a lesser extent than those of the gadolinium and europium based-materials, in agreement with their lower substitution level.

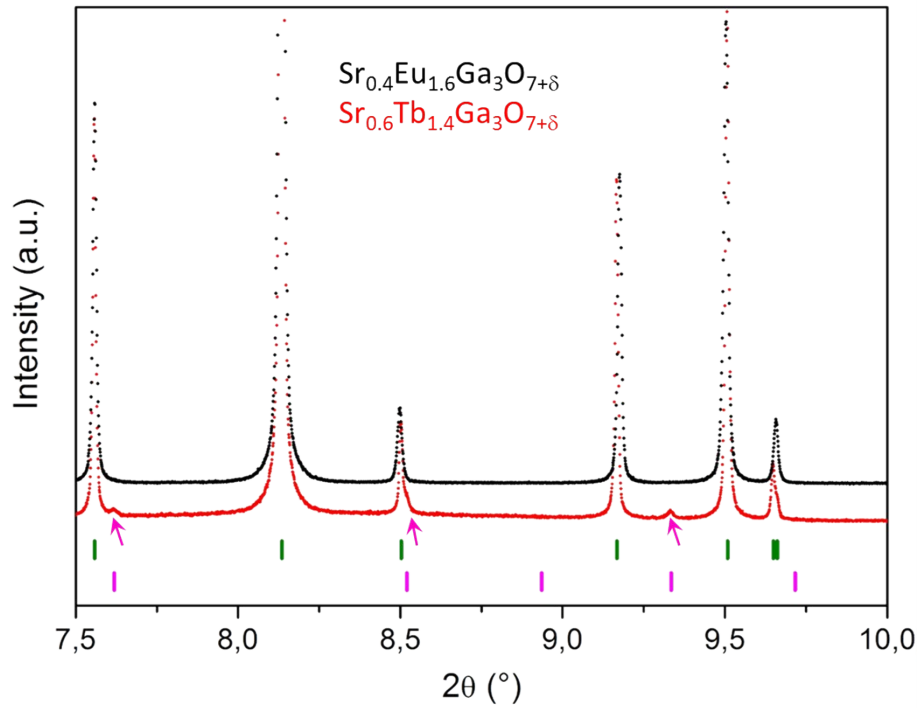

**Fig. S4:** Synchrotron powder diffraction data of  $\text{Eu}_{1.6}\text{Sr}_{0.4}\text{Ga}_3\text{O}_{7+\delta}$  (in black) and  $\text{Tb}_{1.4}\text{Sr}_{0.6}\text{Ga}_3\text{O}_{7+\delta}$  (in red) ceramics (enlargement of the 7.5 to 10° 2θ zone). The set of green and pink vertical lines corresponds to  $\text{Tb}_{1.4}\text{Sr}_{0.6}\text{Ga}_3\text{O}_{7+\delta}$  (melillite) and  $\text{Tb}_3\text{Ga}_5\text{O}_{12}$  (garnet) reflection positions respectively. The arrows point to the  $\text{Tb}_3\text{Ga}_5\text{O}_{12}$  secondary phase.

|     | U11     | U22     | U33     | U12      | U13     | U23      |
|-----|---------|---------|---------|----------|---------|----------|
| Sr1 | 2,18(1) | 2,18(1) | 1,49(2) | 1,42(2)  | 0,13(2) | -0,13(2) |
| Tb1 | 2,18(1) | 2,18(1) | 1,49(2) | 1,42(2)  | 0,13(2) | -0,13(2) |
| Ga1 | 0,85(2) | 0,85(2) | 1,36(4) | 0        | 0       | 0        |
| Ga2 | 1,33(2) | 1,33(2) | 0,48(3) | 0,34(3)  | 0,01(2) | -0,01(1) |
| O1  | 3,93(5) | 3,93(5) | 0,08(5) | 0,84(9)  | 0,23(4) | -0,23(4) |
| O2  | 2,3(6)  | 7,29(9) | 2,52(6) | -2,46(6) | 1,35(5) | -2,09(5) |
| O3  | 4,9(1)  | 4,9(1)  | 0,7(9)  | 3,8(1)   | 0       | 0        |

**Fig. S5:** Anisotropic displacement parameters (ADP) ( $\text{\AA}^2 \times 100$ ) of the final  $\text{Tb}_{1.4}\text{Sr}_{0.6}\text{Ga}_3\text{O}_{7+\delta}$  ceramic determined from the combined Rietveld refinement.

|                                                                      | Archimedes' method                   |                                        | Rietveld Refinement                    |
|----------------------------------------------------------------------|--------------------------------------|----------------------------------------|----------------------------------------|
|                                                                      | $\rho$ (glass)<br>g.cm <sup>-3</sup> | $\rho$ (ceramic)<br>g.cm <sup>-3</sup> | $\rho$ (ceramic)<br>g.cm <sup>-3</sup> |
| Eu <sub>1.6</sub> Sr <sub>0.4</sub> Ga <sub>3</sub> O <sub>7+δ</sub> | 6.25 ± 0.05                          | 6.26 ± 0.05                            | 6.20 ± 0.01                            |
| Gd <sub>1.6</sub> Sr <sub>0.4</sub> Ga <sub>3</sub> O <sub>7+δ</sub> | 6.28 ± 0.05                          | 6.32 ± 0.05                            | 6.33 ± 0.01                            |
| Tb <sub>1.4</sub> Sr <sub>0.6</sub> Ga <sub>3</sub> O <sub>7+δ</sub> | 6.16 ± 0.05                          | 6.13 ± 0.05                            | 6.17 ± 0.01                            |

Fig. S6: Density of the glasses and corresponding ceramics determined from Archimedes' method and calculated from Rietveld refinement.

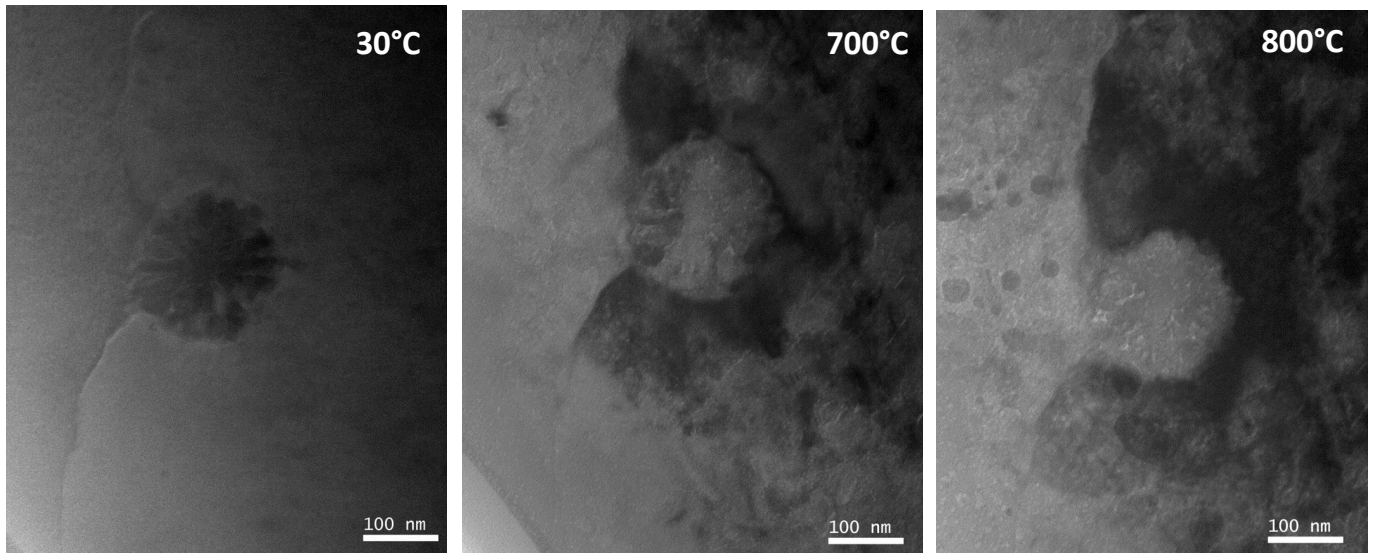

Fig S7: *In situ* observations of the Tb<sub>1.4</sub>Sr<sub>0.6</sub>Ga<sub>3</sub>O<sub>7.2</sub> ceramic heated from room temperature up to 800 °C. Bright field TEM images showing two melilite grains separated by a grain boundary and one Tb<sub>3</sub>Ga<sub>5</sub>O<sub>12</sub> nanoparticle aggregate. No microstructural evolution can be observed. Black marks appearing at 800°C are related to carbon contamination during STEM experiment.

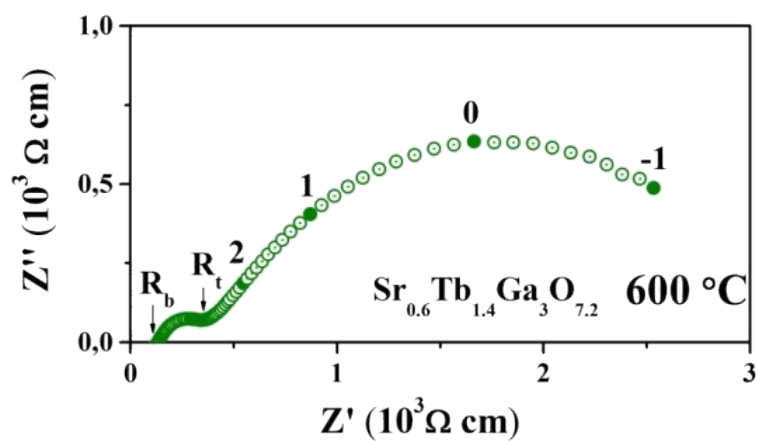

Fig S8: Complex impedance plots at 600 °C for the Tb<sub>1.4</sub>Sr<sub>0.6</sub>Ga<sub>3</sub>O<sub>7.2</sub> ceramic. R<sub>b</sub> and R<sub>t</sub> denote the bulk and total resistivities, respectively. The numbers denote the logarithms of selected frequencies marked by filled circles.

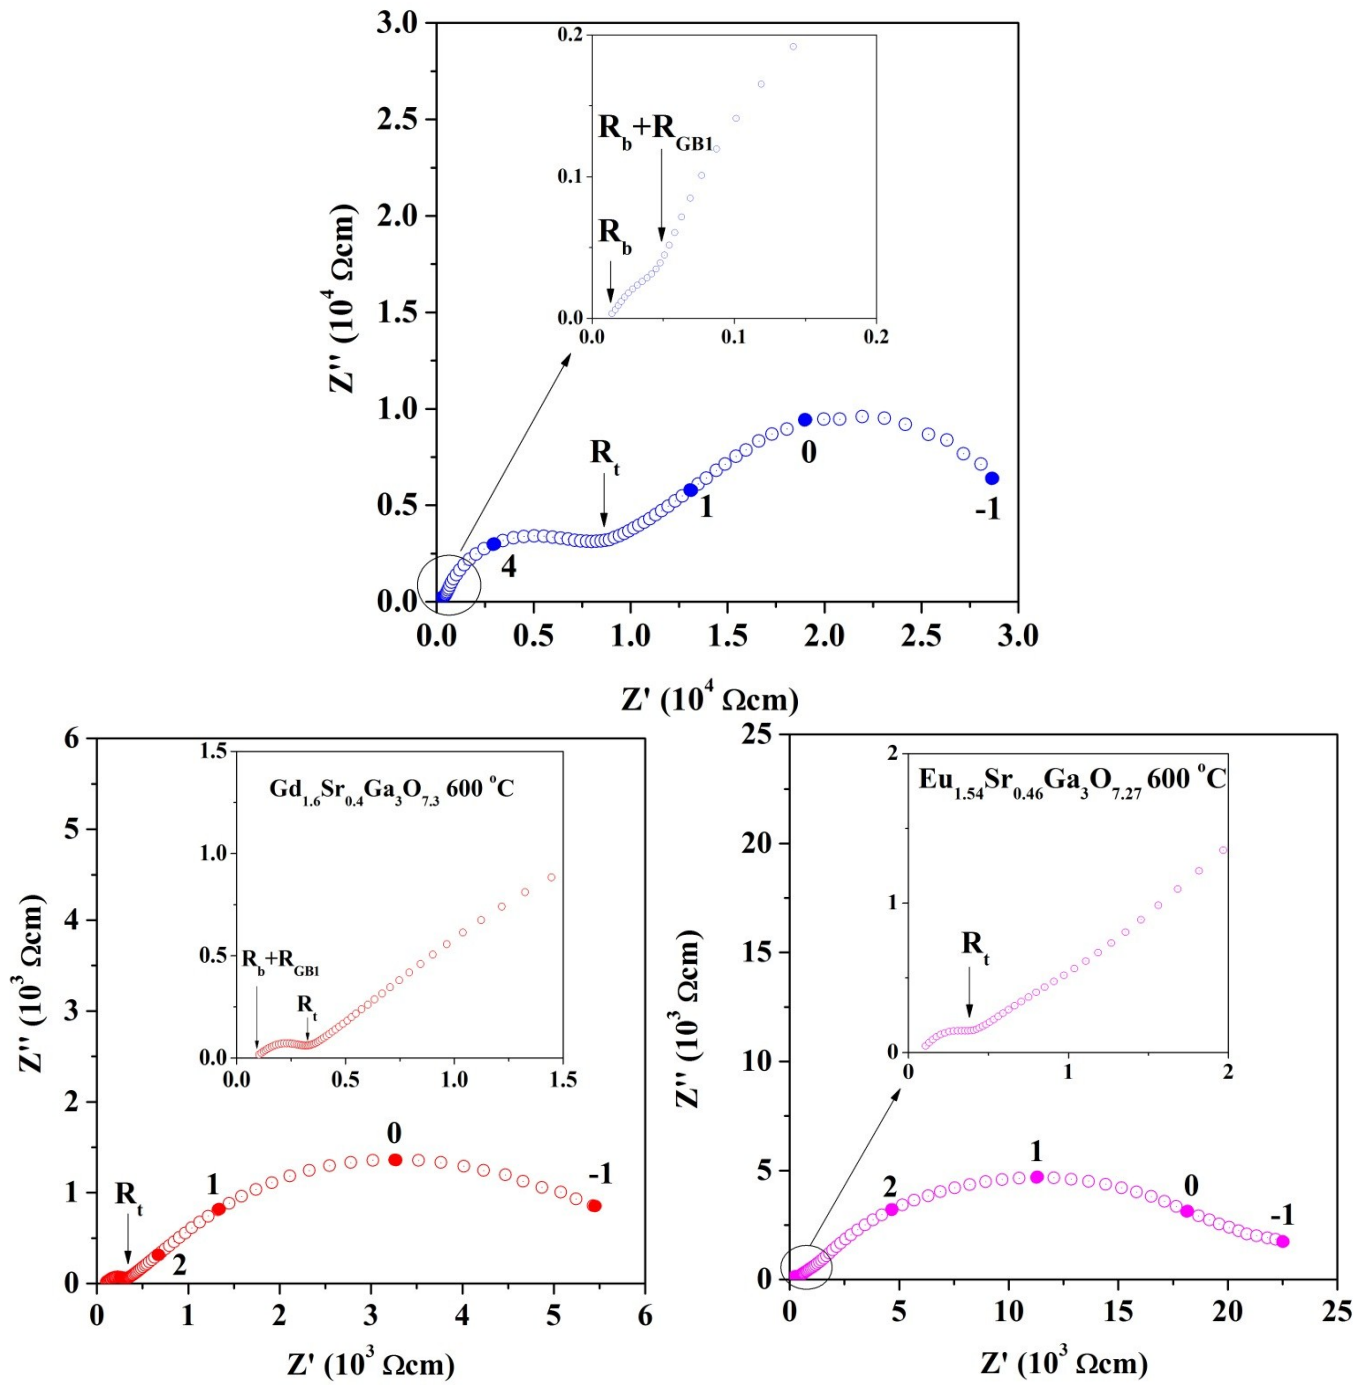

Fig. S9: Complex impedance plot at 500 °C (top) for  $\text{Gd}_{1.6}\text{Sr}_{0.4}\text{Ga}_3\text{O}_{7.3}$  ceramic and 600 °C (down) for  $\text{Gd}_{1.6}\text{Sr}_{0.4}\text{Ga}_3\text{O}_{7.3}$  and  $\text{Eu}_{1.54}\text{Sr}_{0.46}\text{Ga}_3\text{O}_{7.27}$  ceramics. The numbers denote the logarithms of selected frequencies marked by filled circles. The insets enlarge the plots in the high frequency range.

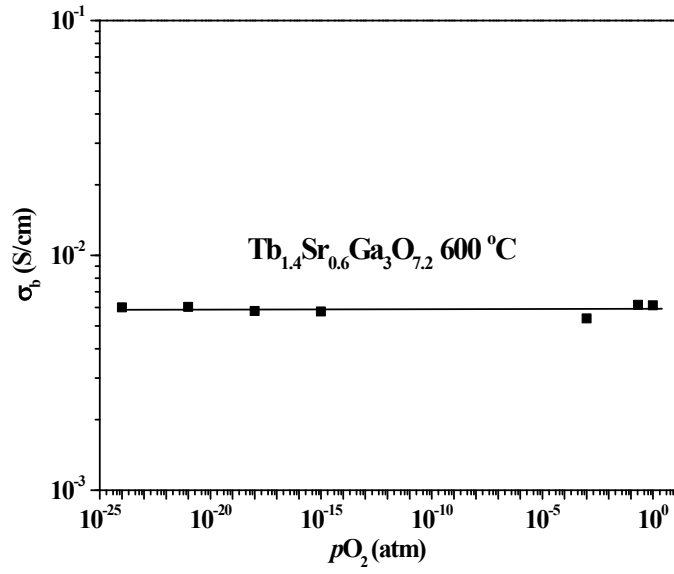

Fig. S10: Bulk conductivity as a function of  $p\text{O}_2$  for  $\text{Tb}_{1.4}\text{Sr}_{0.6}\text{Ga}_3\text{O}_{7.2}$ . No evolution is observed, proving the pure ionic conductivity of these ceramics.

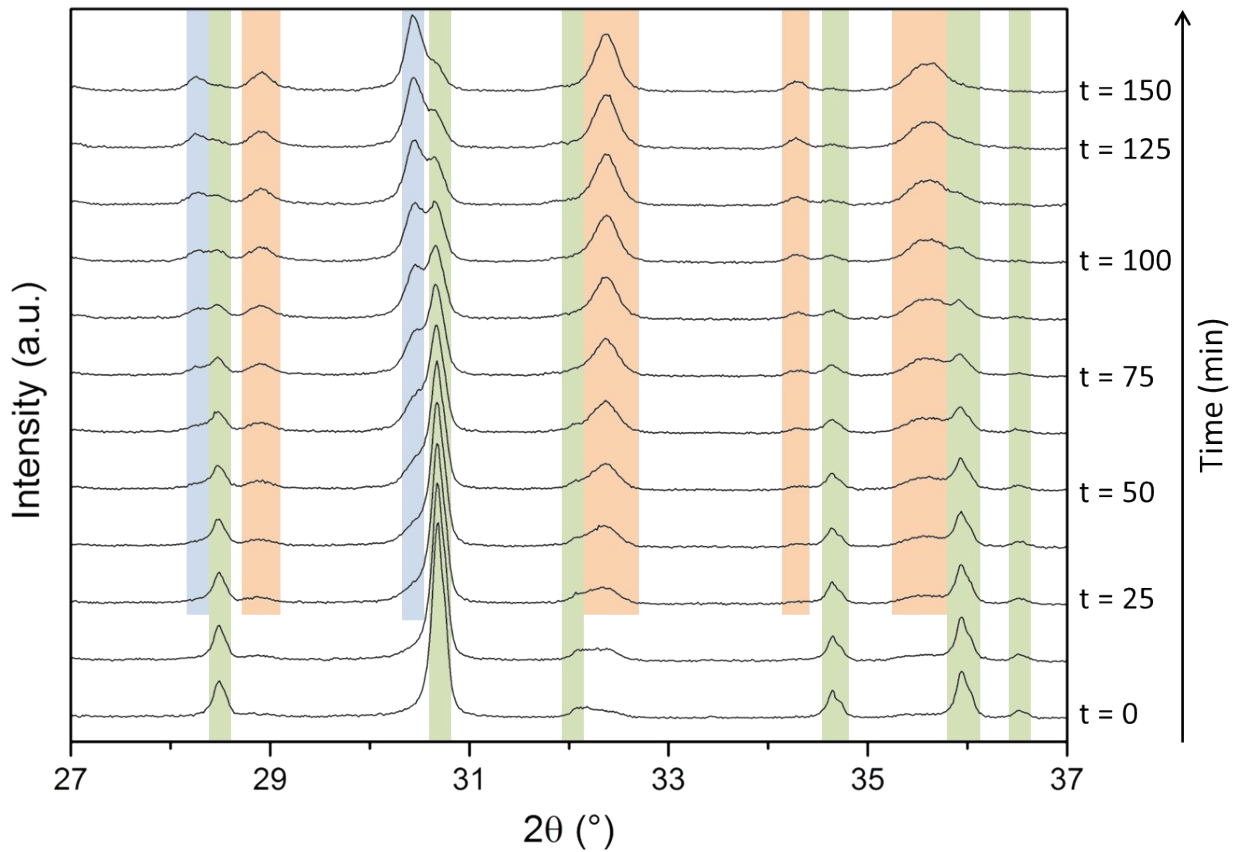

Fig. S11: *in situ* XRD measurement of the  $\text{Tb}_{1.4}\text{Sr}_{0.6}\text{Ga}_3\text{O}_{7.6}$  ceramic at 900°C for 2h30min. The diffractograms were acquired each 12.5 min. Green bands correspond to the  $\text{Tb}_{1.4}\text{Sr}_{0.6}\text{Ga}_3\text{O}_{7.6}$  reflections whereas the blue and orange ones are related to the degradation into  $\text{TbSrGa}_3\text{O}_7$  (stoichiometric melilite) and  $\text{Tb}_3\text{Ga}_5\text{O}_{12}$  (garnet) phases respectively.

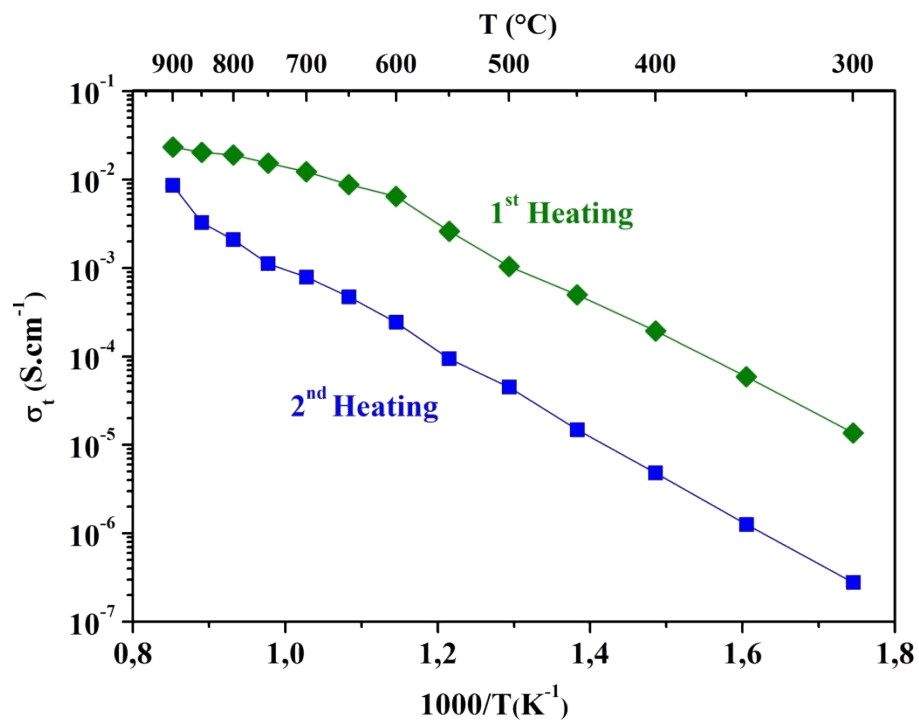

Fig. S12: Total conductivity of a  $Tb_{1.4}Sr_{0.6}Ga_3O_{7+\delta}$  ceramic bead, after a first (green) and a second heating cycle (blue).

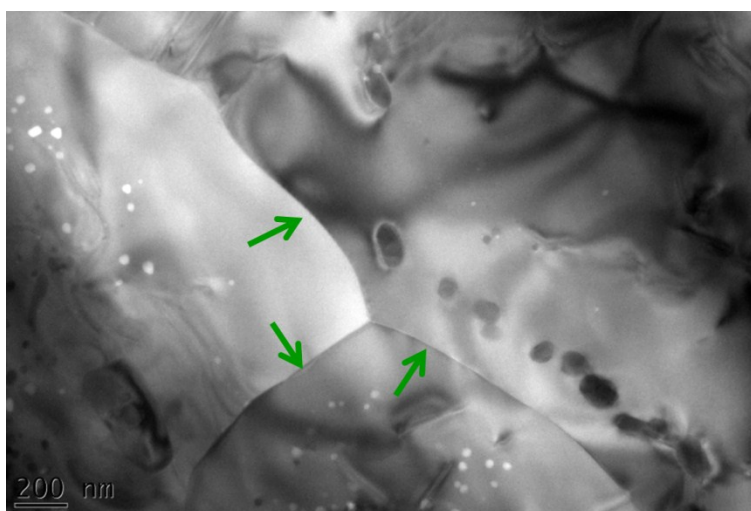

Fig. S13: Bright field TEM micrograph of intact thin grain boundaries (green arrows) in the  $Tb_{1.4}Sr_{0.6}Ga_3O_{7+\delta}$  ceramic after ionic conductivity measurements at high temperature.
